# Supplementary material for: Synthesis, investigation of the crystal structure, DFT calculations, and in silico medicinal potential of hydrazono- and aminomethylene substituted pyrazolidine-3,5-diones as potential anticancer scaffolds
Source: Royal Society of Chemistry journal article supplement (doi:10.1039/d4nj01839g), 2024-01-01
Supplement: d4nj01839g1.pdf [file d4nj01839g1.pdf]

**Synthesis, investigation of the crystal structure, DFT, and *In silico* medicinal potential of hydrazono- and aminomethylene substituted pyrazolidine-3,5-diones as potential anticancer scaffolds**

**Youness El Bakri <sup>a,\*</sup>, Sabir Ali Siddique <sup>b,\*</sup>, Shaaban K. Mohamed <sup>c,d</sup>, Muhammad Sarfraz <sup>b</sup>, Hatem A. Abuelizz <sup>e</sup>, Rashad Al-Salahi <sup>e</sup>, Joel T. Mague <sup>f</sup>, Eman A. Ahmed <sup>g</sup>**

<sup>a</sup> *Department of Theoretical and Applied Chemistry, South Ural State University, Lenin prospect 76, Chelyabinsk, 454080, Russian Federation.*

<sup>b</sup> *Institute of Chemistry, The Islamia University of Bahawalpur, Baghdad-ul-Jadeed Campus, Bahawalpur, 63100, Pakistan.*

<sup>c</sup> *Chemistry and Environmental Division, Manchester Metropolitan University, Manchester, M1 5GD, England.*

<sup>d</sup> *Chemistry Department, Faculty of Science, Minia University, 61519 El-Minia, Egypt.*

<sup>e</sup> *Department of Pharmaceutical Chemistry, College of Pharmacy, King Saud University, Riyadh 11451, Saudi Arabia.*

<sup>f</sup> *Department of Chemistry, Tulane University, New Orleans, LA 70118, USA.*

<sup>g</sup> *Chemistry Department, Faculty of Science, Sohag University, 82524 Sohag, Egypt.*

**Corresponding authors:** [yns.elbakri@gmail.com](mailto:yns.elbakri@gmail.com); [sabir.siddique@hotmail.com](mailto:sabir.siddique@hotmail.com)

2

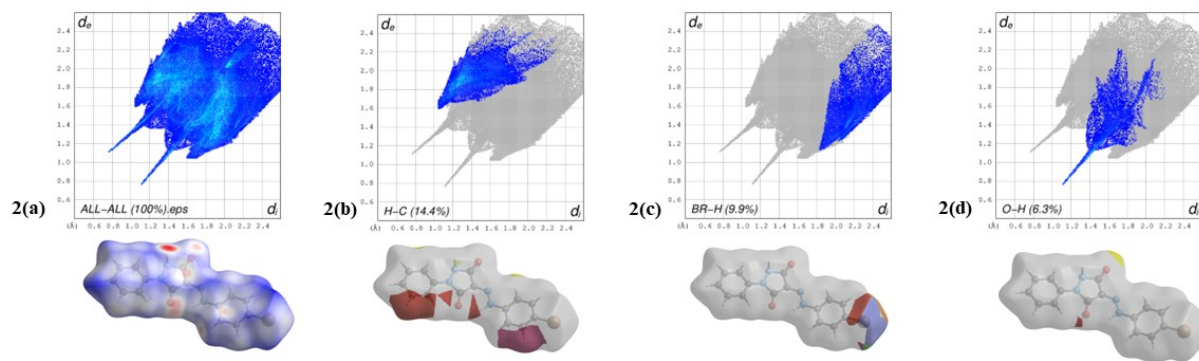

3

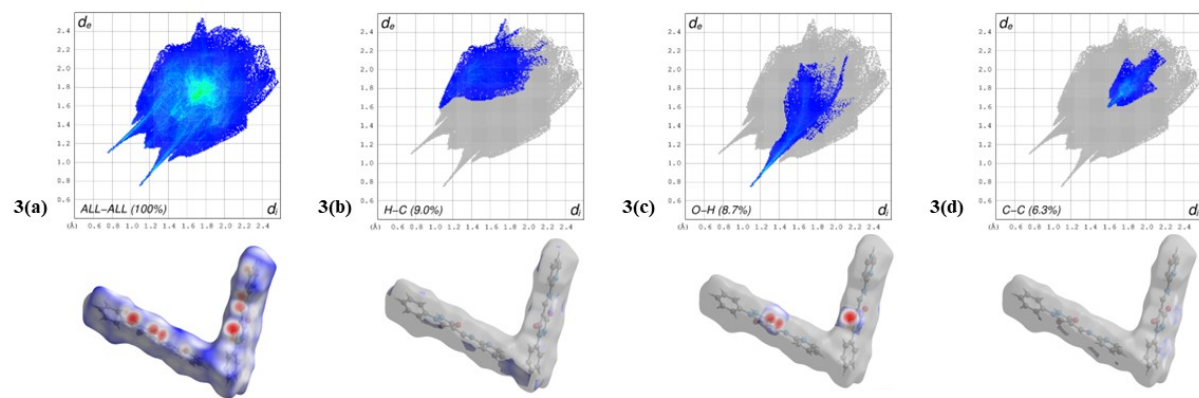

Figure S1. Overall (top left) and delineated two-dimensional fingerprint plots for 2 (2a, 2b, 2c, and 2d) and 3 (3a, 3b, 3c, and 3d).

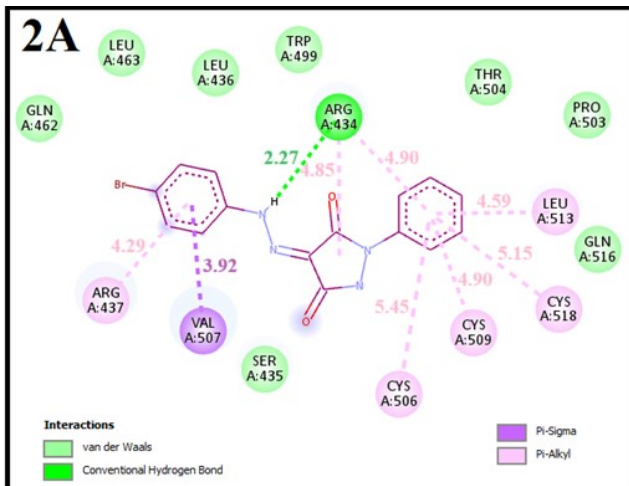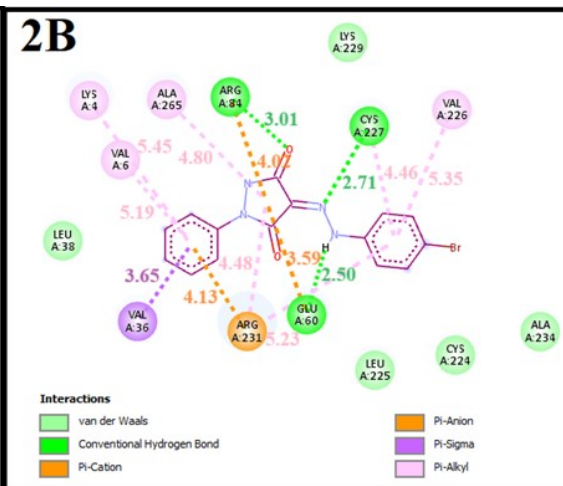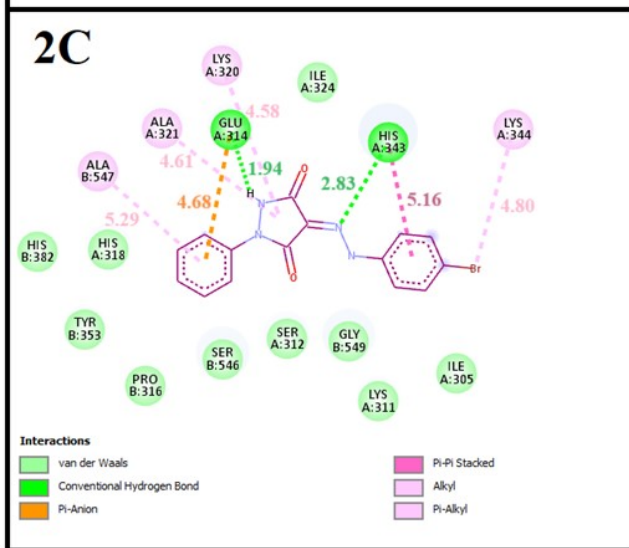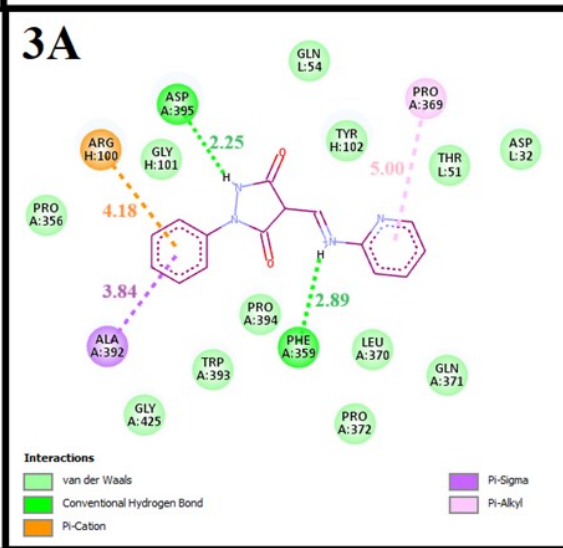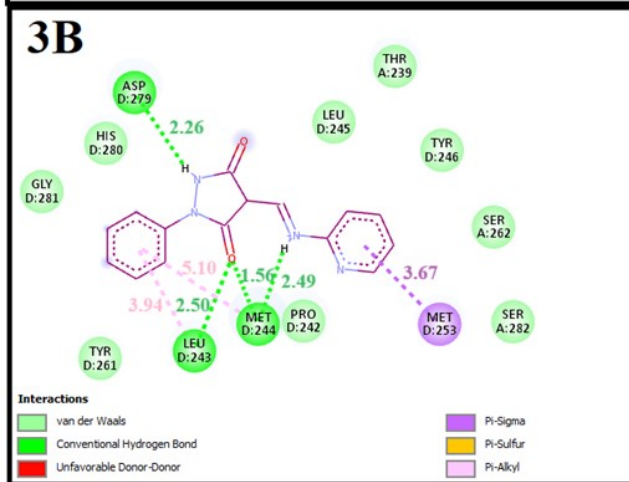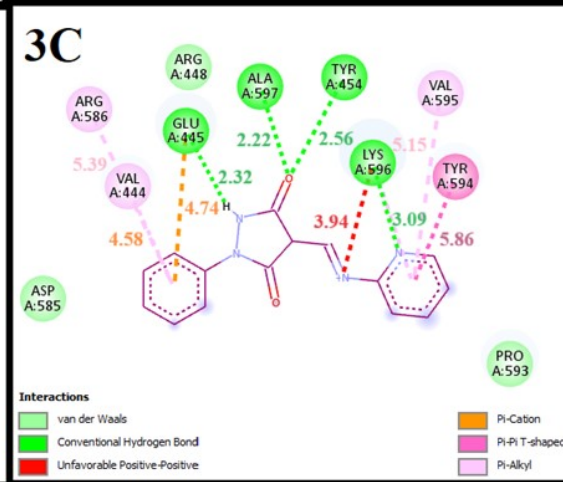

**Figure S2.** Two-dimensional representations of the binding pockets and interactions between amino acids and **2** and **3** during the complex formation

**Table S1.** Crystal and refinement data.

| Compound                   | <b>2</b>                                                        | <b>3</b>                                                      |
|----------------------------|-----------------------------------------------------------------|---------------------------------------------------------------|
| Chemical formula           | C <sub>15</sub> H <sub>11</sub> BrN <sub>4</sub> O <sub>2</sub> | C <sub>15</sub> H <sub>12</sub> N <sub>4</sub> O <sub>2</sub> |
| Formula weight (g/mol)     | 359.19                                                          | 280.29                                                        |
| Temperature (K)            | 125(2)                                                          | 125(2)                                                        |
| Wavelength (Å)             | 0.71073                                                         |                                                               |
| Crystal size (mm)          | 0.030 x 0.174 x 0.322                                           | 0.058 x 0.187 x 0.270                                         |
| Crystal system             | monoclinic                                                      | triclinic                                                     |
| Space group                | Pc                                                              | P -1                                                          |
| Unit cell dimensions (Å,°) |                                                                 |                                                               |
| <i>a</i>                   | 16.1068(17)                                                     | 6.1973(8)                                                     |
| <i>b</i>                   | 5.7977(6)                                                       | 10.2465(13)                                                   |
| <i>c</i>                   | 7.4341(8)                                                       | 20.461(3)                                                     |
| <i>α</i>                   | 90                                                              | 102.548(4)                                                    |
| <i>β</i>                   | 94.755(4)                                                       | 94.531(4)                                                     |
| <i>γ</i>                   | 90                                                              | 95.302(4)                                                     |
| Volume                     | 691.82(13)                                                      | 1256.2(3)                                                     |

|                                            |                                         |                                        |
|--------------------------------------------|-----------------------------------------|----------------------------------------|
| <b>Z</b>                                   | 2                                       | 4                                      |
| <b>Density (calc., g/cm<sup>3</sup>)</b>   | 1.742                                   | 1.482                                  |
| <b>Abs. Coeff. (mm<sup>-1</sup>)</b>       | 2.984                                   | 0.103                                  |
| <b>F(000)</b>                              | 360                                     | 584                                    |
| <b>Radiation Source</b>                    | fine-focus sealed tube (MoK $\alpha$ )  |                                        |
| <b>Theta range (°)</b>                     | 2.54 to 32.13                           | 2.05 to 28.51                          |
| <b>Reflections collected</b>               | 28969                                   | 6336                                   |
| <b>Abs. Corr.</b>                          | Numerical $\mu$ Calculated              | Multi-scan                             |
| <b>T<sub>max</sub> and T<sub>min</sub></b> | 0.616 and 0.447                         | 0.994 and 0.973                        |
| <b>Function minimized</b>                  | $\Sigma w(F_o^2 - F_c^2)^2$             |                                        |
| <b>Data/Restraints/Parameters</b>          | 4805 / 4 / 208                          | 6336 / 4 / 392                         |
| <b>Final R Indices</b>                     |                                         |                                        |
| Data ; I>2 $\sigma$ (I)                    | 4278 data; R1 = 0.0419,<br>wR2 = 0.1060 | 4661 data; R1= 0.0856,<br>wR2 = 0.2151 |
| All data                                   | R1 = 0.0485,<br>wR2 = 0.1092            | R1 = 0.1116,<br>wR2 = 0.2266           |
| <b>Goodness-of-fit on F<sup>2</sup></b>    | 1.094                                   | 1.090                                  |

|                                                      |                                               |                                               |
|------------------------------------------------------|-----------------------------------------------|-----------------------------------------------|
| <b>Weighting scheme</b>                              | $w=1/[\sigma^2(F_o^2)+(0.0640P)^2+0.1076P]^a$ | $w=1/[\sigma^2(F_o^2)+(0.0577P)^2+4.9083P]^a$ |
| <b>Largest diff. peak and hole (eÅ<sup>-3</sup>)</b> | 1.215 and -0.477                              | 0.356 and -0.355                              |
| <b>R.M.S. deviation from mean (eÅ<sup>-3</sup>)</b>  | 0.110                                         | 0.081                                         |

$$^aP=(F_o^2+2F_c^2)/3$$

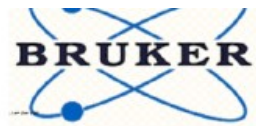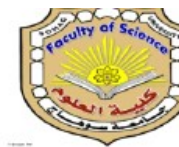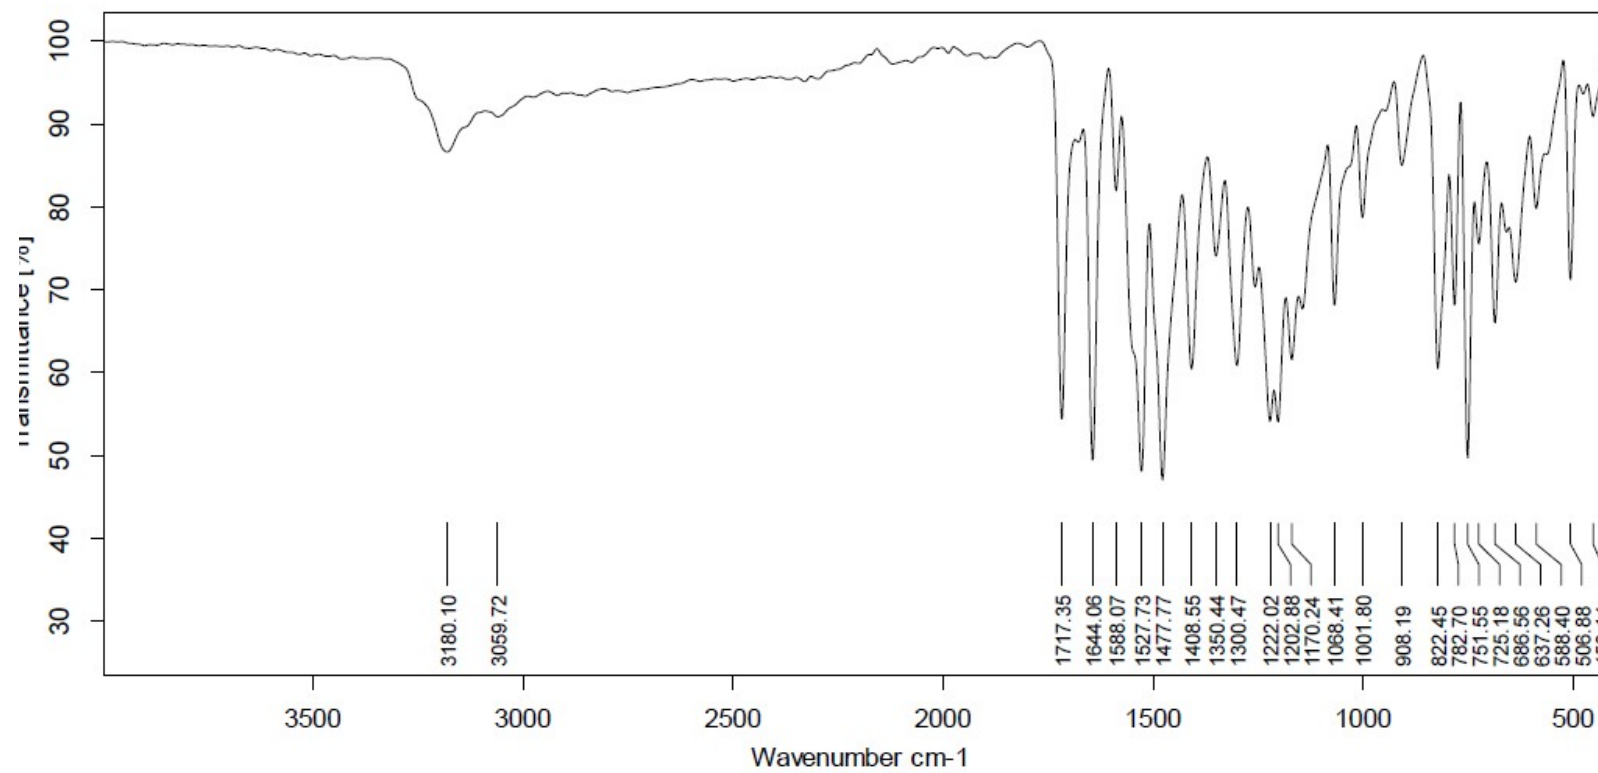

Figure S3. IR spectra of 2

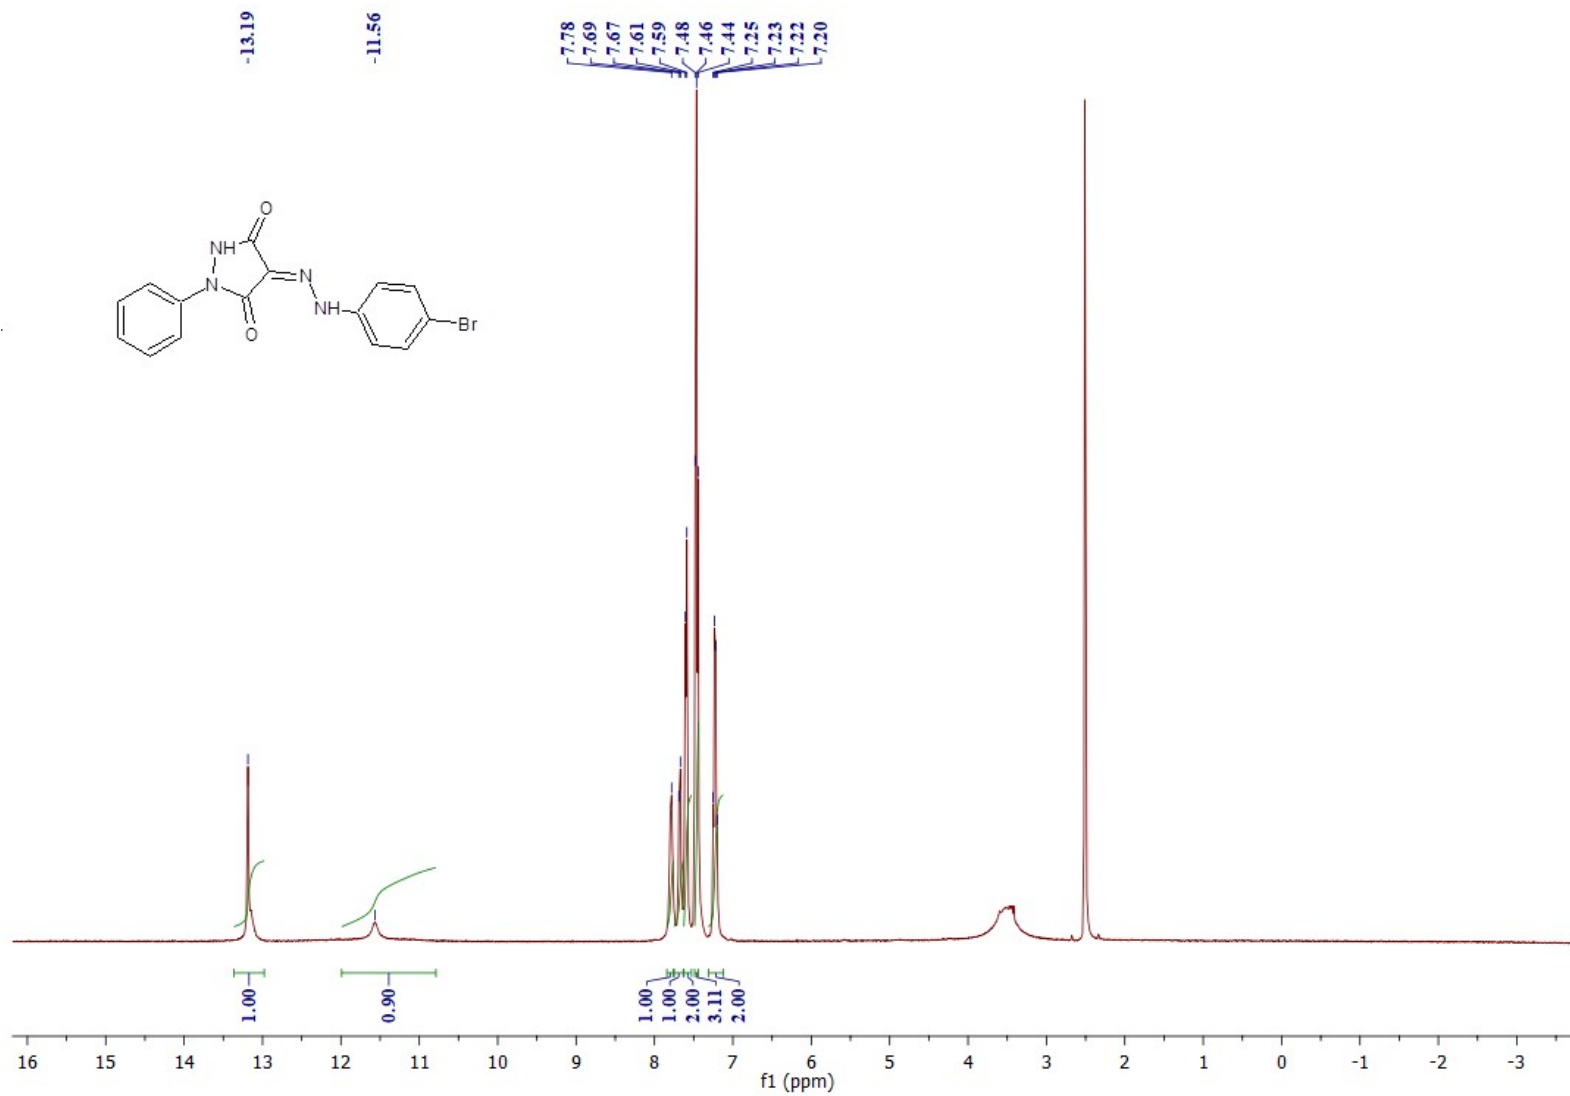

Figure S4. <sup>1</sup>H NMR spectrum of 2



D2O

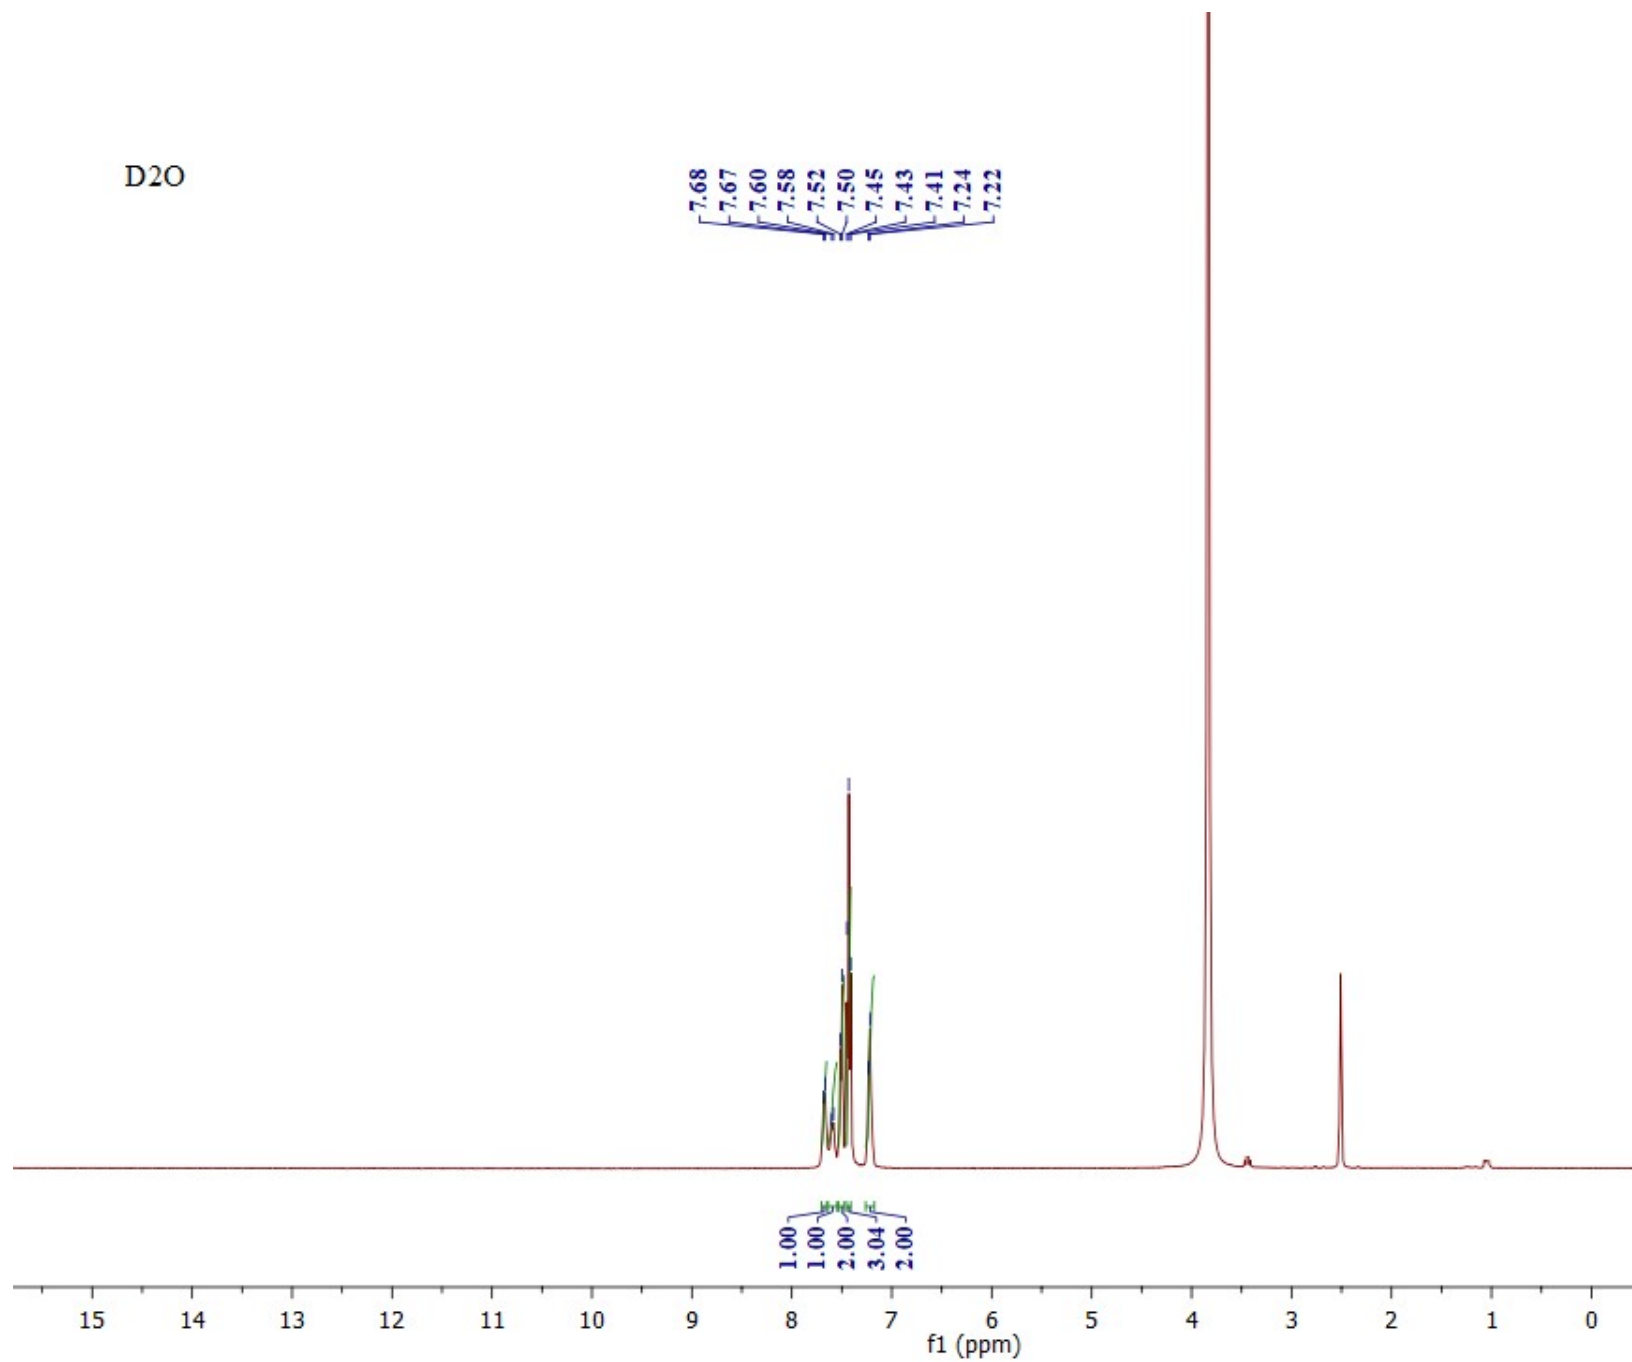

Figure S5.  $^1\text{H}$  NMR spectrum of **2**

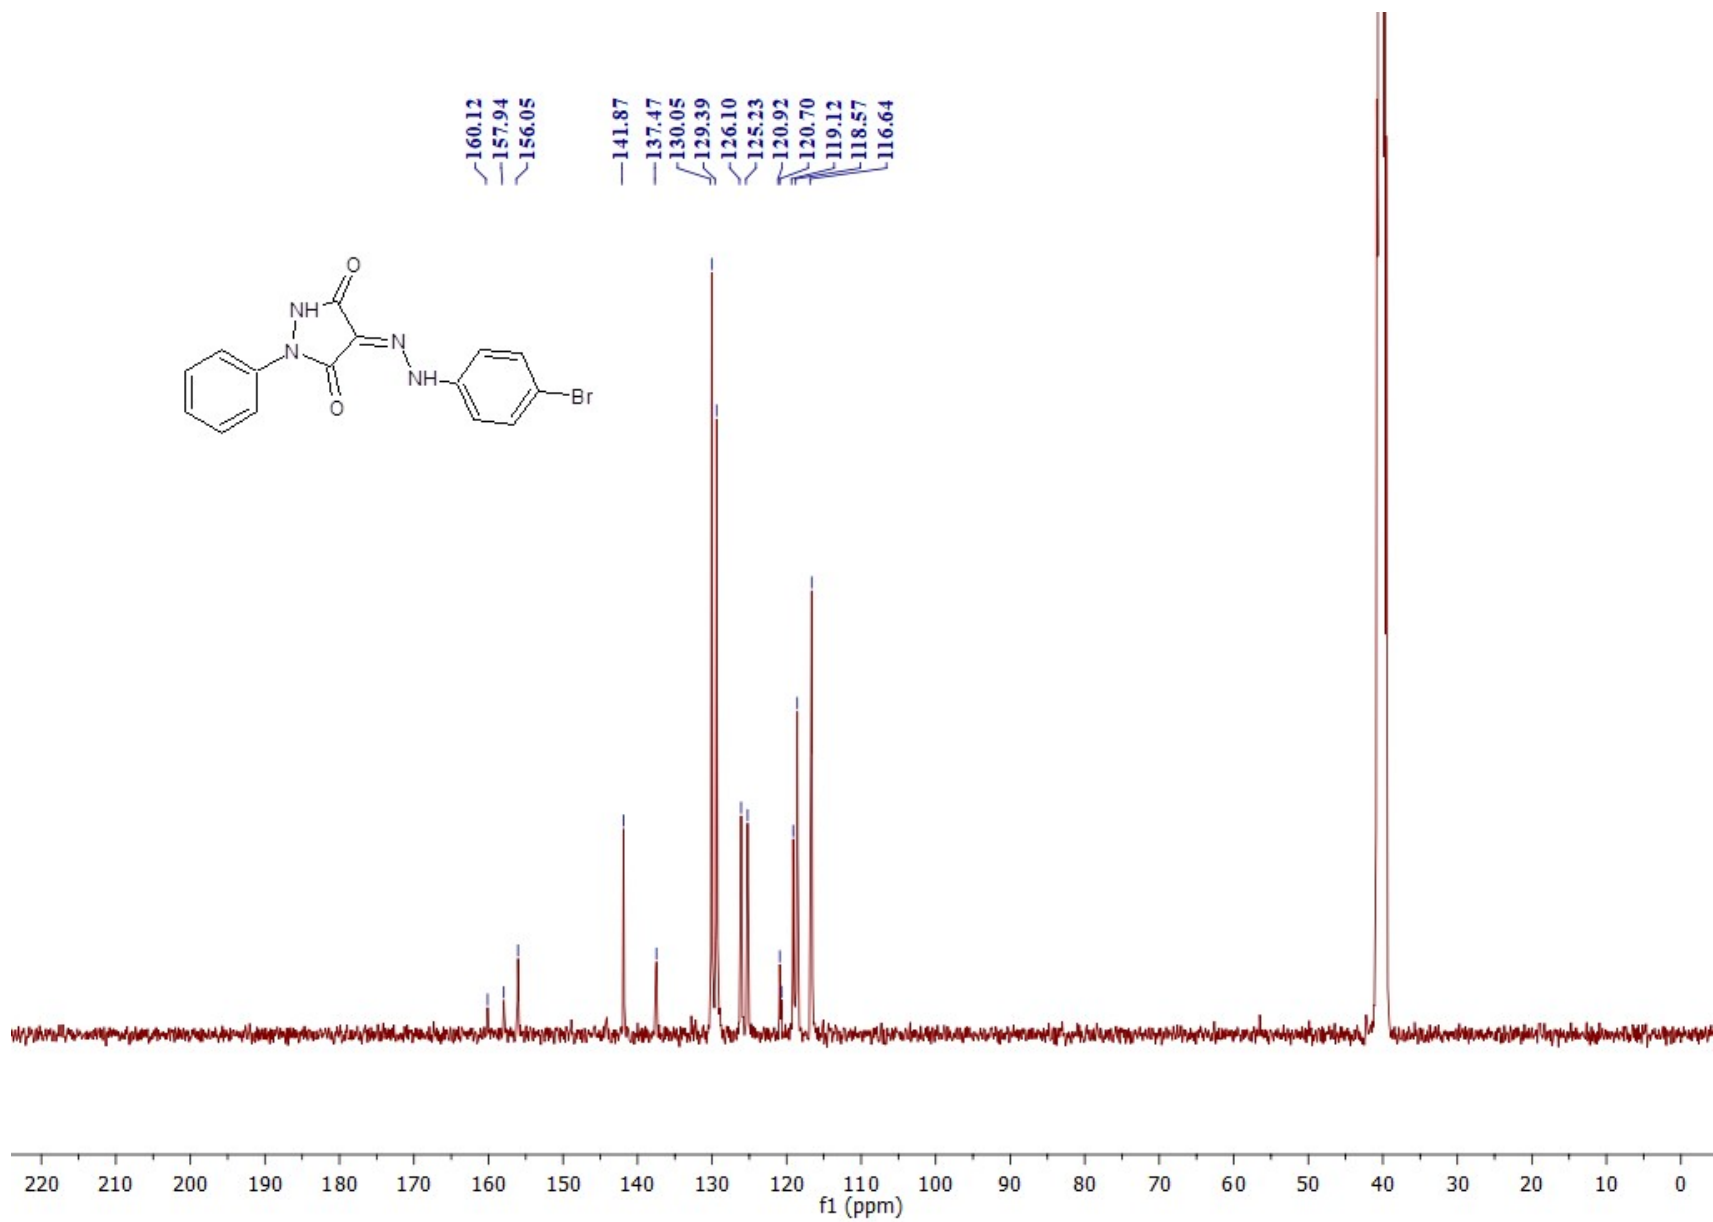

Figure S6. <sup>13</sup>C NMR spectrum of 2

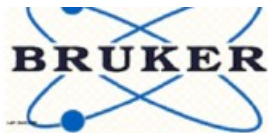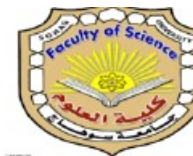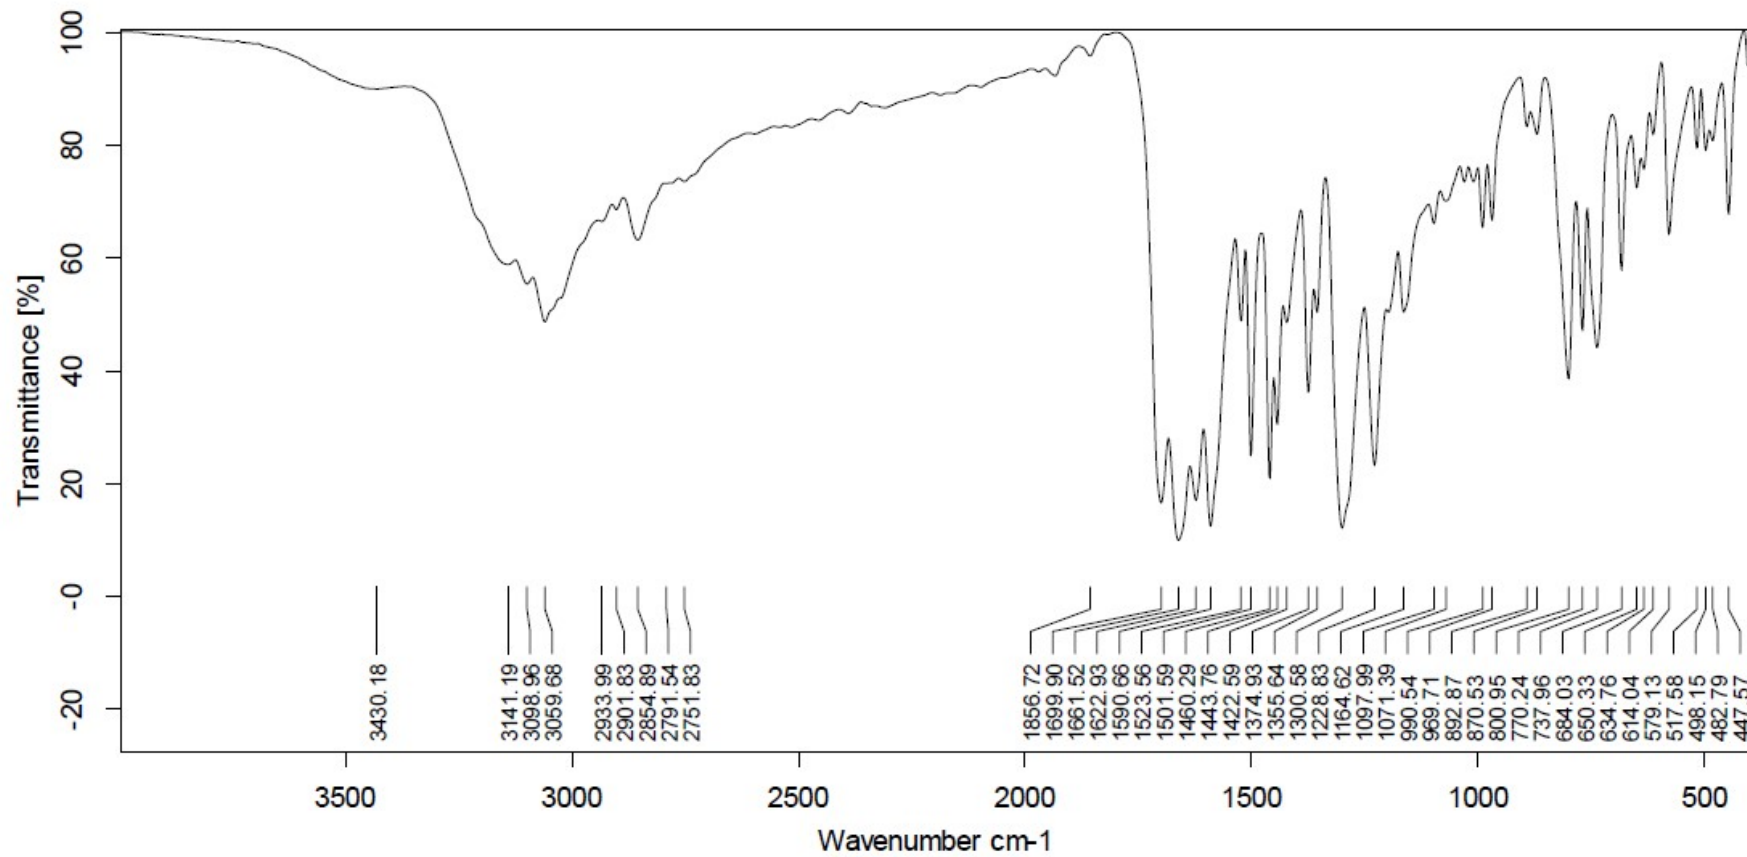

Figure S7. IR spectra of 3

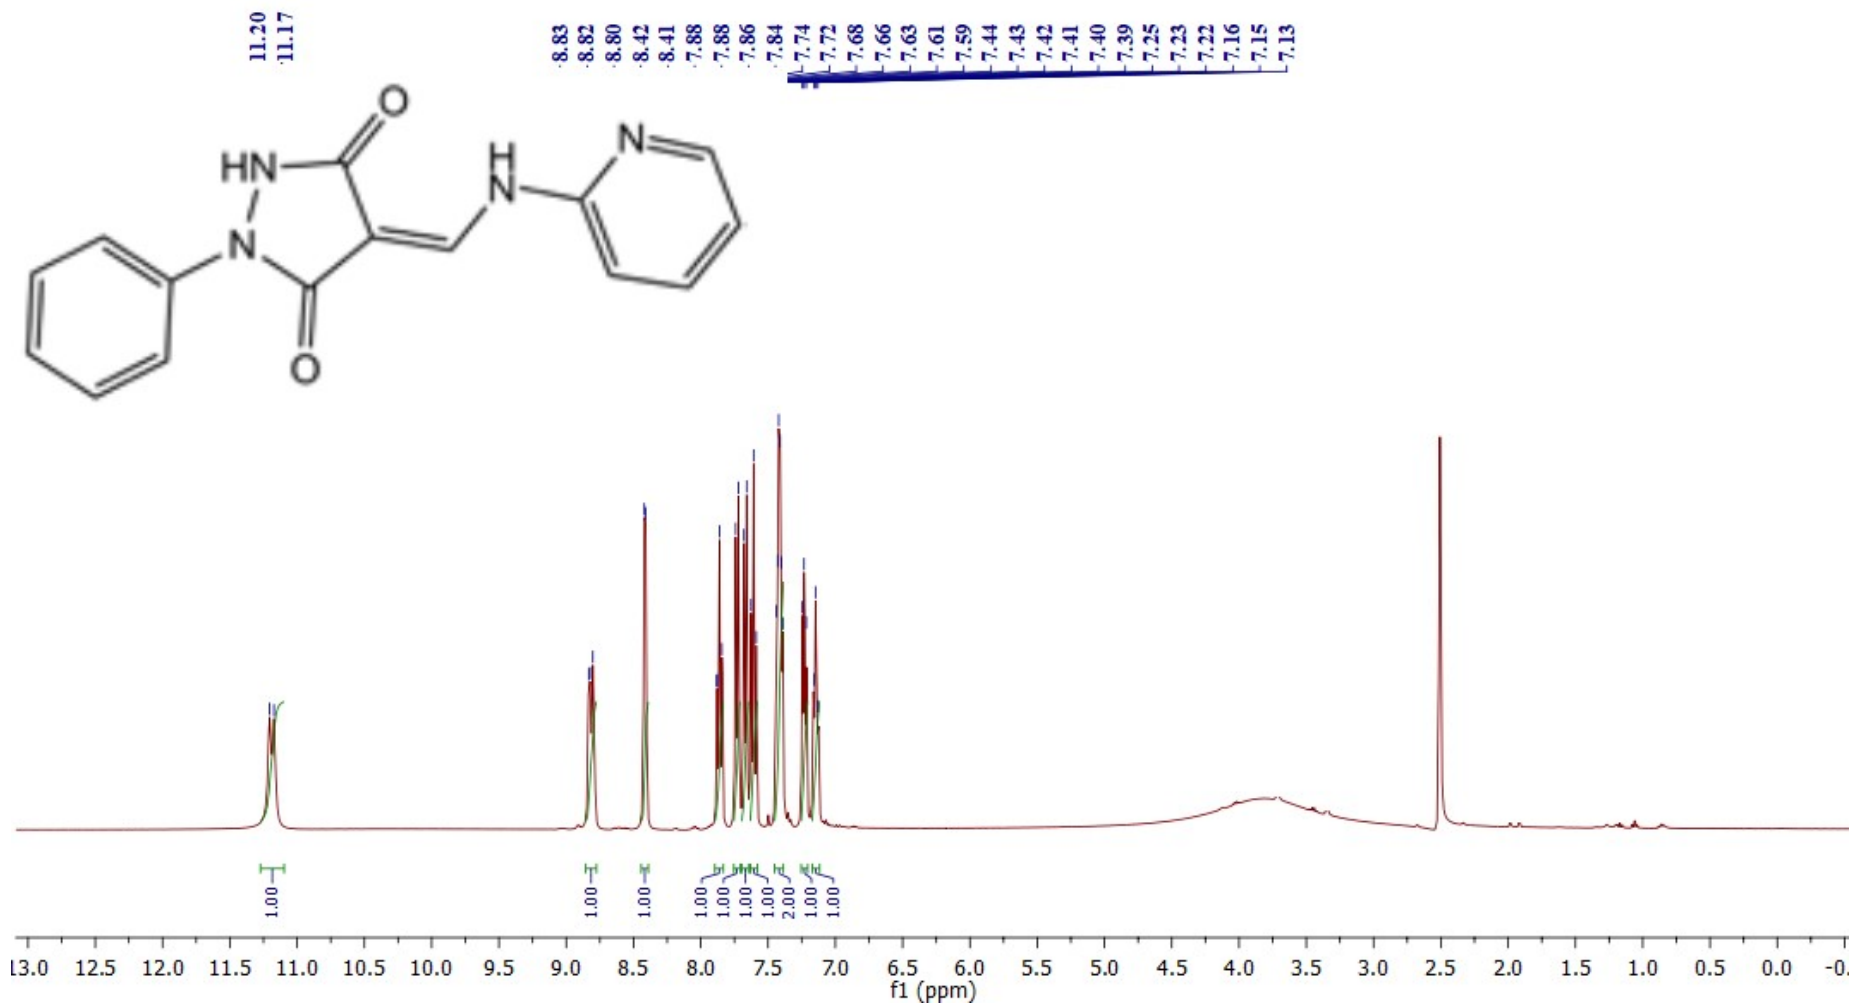

Figure S8. <sup>1</sup>H NMR spectrum of **3**
